# Supplementary material for: Laser cooling of the OH− molecular anion in a theoretical investigation
Source: Royal Society of Chemistry journal article supplement (doi:10.1039/c7cp04393g), 2017-01-01
Supplement: c7cp04393g1.pdf [file c7cp04393g1.pdf]

Table. Compared with spectroscopic parameters for the  $\Lambda$ - S states of OH<sup>-</sup> anion at spin free MRCI+Q level based on different basis sets.

| states        | basis sets          | $R_e$ (Å) | $\omega_e$ (cm <sup>-1</sup> ) | $\omega_e x_e$ (cm <sup>-1</sup> ) | $B_e$ (cm <sup>-1</sup> ) | $D_e$ (eV)            | $T_e$ (cm <sup>-1</sup> ) | $\nu$ (cm <sup>-1</sup> ) |
|---------------|---------------------|-----------|--------------------------------|------------------------------------|---------------------------|-----------------------|---------------------------|---------------------------|
| $X^1\Sigma^+$ | basis1 <sup>a</sup> | 0.9645    | 3722.10                        | 87.93                              | 19.1111                   | 4.9857                | 0                         | 3555.932                  |
|               | basis2 <sup>b</sup> | 0.9645    | 3722.20                        | 87.93                              | 19.1113                   | 4.9858                | 0                         | 3556.033                  |
|               | basis3 <sup>c</sup> | 0.9636    | 3727.96                        | 87.40                              | 19.1417                   | 5.0193                | 0                         | 3559.882                  |
|               | basis4 <sup>d</sup> | 0.9636    | 3728.64                        | 87.43                              | 19.1430                   | 5.0203                | 0                         | 3560.636                  |
|               | Expt. <sup>23</sup> |           | 3680 ± 37                      |                                    | 19.13                     | 4.981 <sup>22 e</sup> |                           |                           |
|               | Expt. <sup>24</sup> | 0.9643    | 3738.44                        | 91.42                              | 19.1209                   |                       |                           | 3555.605                  |
| $a^3\Pi$      | basis1 <sup>a</sup> | 0.9790    | 3402.39                        | 146.44                             | 18.5735                   | 2.6693                | 18674.86                  | 3318.210                  |
|               | basis2 <sup>b</sup> | 0.9789    | 3402.48                        | 146.45                             | 18.5737                   | 2.6693                | 18675.81                  | 3318.298                  |
|               | basis3 <sup>c</sup> | 0.9782    | 3403.47                        | 145.96                             | 18.5989                   | 2.6893                | 18789.31                  | 3319.562                  |
|               | basis4 <sup>d</sup> | 0.9781    | 3404.28                        | 145.99                             | 18.6004                   | 2.6900                | 18791.46                  | 3320.332                  |
| $A^1\Pi$      | basis1 <sup>a</sup> | 0.9763    | 3864.48                        | 177.96                             | 18.6615                   | 2.6128                | 19130.88                  | 3410.554                  |
|               | basis2 <sup>b</sup> | 0.9763    | 3864.56                        | 177.97                             | 18.6617                   | 2.6128                | 19131.80                  | 3410.638                  |
|               | basis3 <sup>c</sup> | 0.9755    | 3868.36                        | 177.06                             | 18.6882                   | 2.6326                | 19246.12                  | 3412.515                  |
|               | basis4 <sup>d</sup> | 0.9754    | 3869.14                        | 177.08                             | 18.6896                   | 2.6333                | 19248.20                  | 3413.255                  |

<sup>a</sup> At AV5Z-DK for H and ACV5Z-DK for O level;

<sup>b</sup> At AV5Z for H and ACV5Z for O level;

<sup>c</sup> At AV5Z-DK for H and O level;

<sup>d</sup> At AV5Z for H and O level;

<sup>e</sup>  $D_e$  (OH<sup>-</sup>) = 0.36 eV + 4.921 eV. Where 4.921 eV was the  $D_e$  for the ground state X<sup>2</sup>Π of OH molecule.<sup>48</sup>

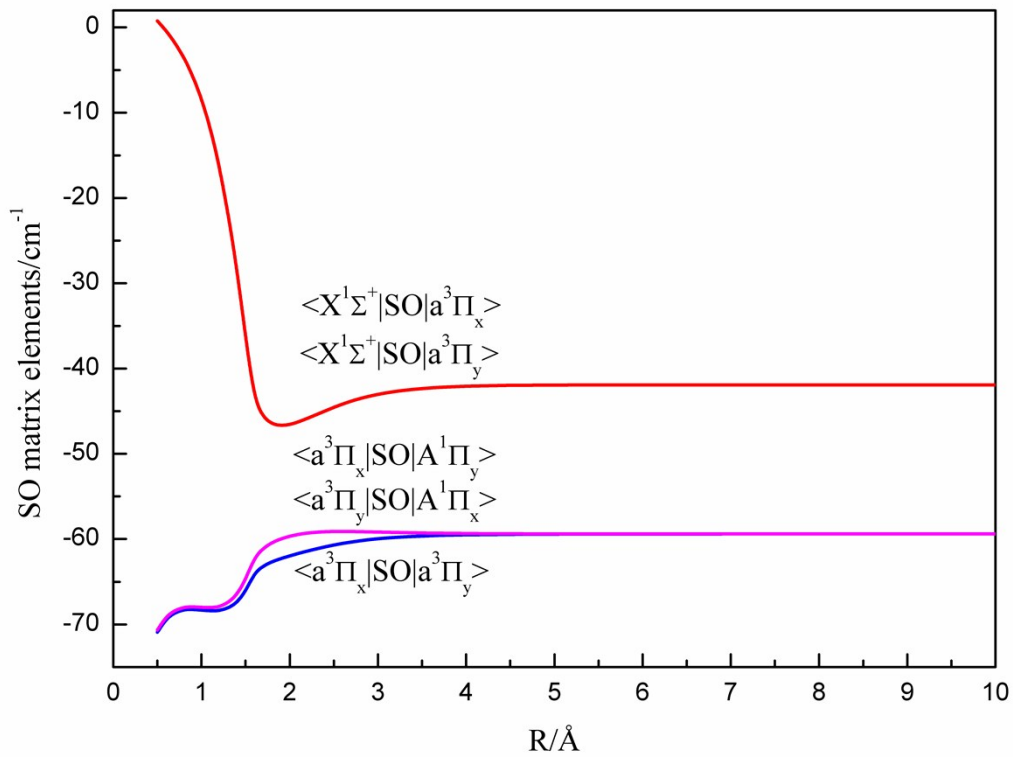

Figure. The SO matrix elements of OH<sup>-</sup> anion.
